# Supplementary material for: Virtual Screening of Artemisia annua Phytochemicals as Potential Inhibitors of SARS-CoV-2 Main Protease Enzyme
Source: MDPI journal article supplement (doi:10.3390/molecules27228103), 2022-11-21
Supplement: s1 [file s1]

## Supplementary file

# Virtual Screening of *Artemisia annua* Phytochemicals as Potential Inhibitors of SARS-CoV-2 Main Protease Enzyme

Khalid Miandad <sup>1</sup>, Asad Ullah <sup>1</sup>, Kashif Bashir <sup>1</sup>, Saifullah Khan <sup>2</sup>, Syed Ainul Abideen <sup>3</sup>, Bilal Shaker <sup>4</sup>, Metab Alharbi <sup>5</sup>, Abdulrahman Alshammari <sup>5</sup>, Mahwish Ali <sup>6</sup>, Abdul Haleem <sup>7</sup> and Sajjad Ahmad <sup>1,\*</sup>

<sup>1</sup> Department of Health and Biological Sciences, Abasyn University, Peshawar 25000, Pakistan

<sup>2</sup> Institute of Biotechnology and Microbiology, Bacha Khan University, Charsadda, Pakistan

<sup>3</sup> School of Biomedical Engineering, Shanghai Jiao Tong University, China

<sup>4</sup> Department of Biomedical Engineering, Chung-Ang University, Seoul, South Korea

<sup>5</sup> Department of Pharmacology and Toxicology, College of Pharmacy, King Saud University, P.O. Box 2455, Riyadh 11451, Saudi Arabia

<sup>6</sup> Department of Biological Science, National University of Medical Sciences, Rawalpindi 46000, Pakistan

<sup>7</sup> Department of Microbiology, Quaid-i-Azam University, Islamabad, Pakistan

\* Correspondence: sajjad.ahmad@abasyn.edu.pk

**Table S1.** Physiochemical properties and pharmacokinetics analysis (ADME) of Top-3 complexes.

| Compounds | Top-1                      | Top-2 | Top-3 |
|-----------|----------------------------|-------|-------|
|           | Physicochemical Properties |       |       |

|                        |                       |                      |                      |
|------------------------|-----------------------|----------------------|----------------------|
| Formula                | C13H14N3O4S           | C12H10N2O4           | C13H16N2O4           |
| Molecular weight       | 308.33 g/mol          | 246.22 g/mol         | 264.28 g/mol         |
| Num. heavy atoms       | 21                    | 18                   | 19                   |
| Num. arom. heavy atoms | 11                    | 11                   | 6                    |
| Fraction Csp3          | 0.23                  | 0.08                 | 0.46                 |
| Num. rotatable bonds   | 5                     | 4                    | 5                    |
| Num. H-bond acceptors  | 4                     | 4                    | 4                    |
| Num. H-bond donors     | 3                     | 1                    | 2                    |
| Molar Refractivity     | 77.46                 | 61.13                | 66.85                |
| TPSA                   | 135.72 Å <sup>2</sup> | 86.24 Å <sup>2</sup> | 93.34 Å <sup>2</sup> |
|                        | Lipophilicity         |                      |                      |
| Log Po/w (iLOGP)       | -4.96                 | -0.97                | 0.66                 |
| Log Po/w (XLOGP3)      | 1.84                  | 0.94                 | 1.20                 |
| Log Po/w (WLOGP)       | 0.76                  | 0.96                 | 0.87                 |
| Log Po/w (MLOGP)       | 0.30                  | 0.56                 | 0.63                 |
| Log Po/w (SILICOS-IT)  | 1.88                  | -0.21                | 0.39                 |
| Consensus Log Po/w     | -0.04                 | 0.26                 | 0.75                 |

|                    |                                    |                                          |                                 |
|--------------------|------------------------------------|------------------------------------------|---------------------------------|
|                    | Water Solubility                   |                                          |                                 |
| Log S (ESOL)       | -2.97                              | -2.15                                    | -2.14                           |
| Solubility         | 3.32e-01 mg/ml<br>; 1.08e-03 mol/l | 1.76e+00<br>mg/ml ;<br>7.13e-03<br>mol/l | 1.92e+00 mg/ml ; 7.27e-03 mol/l |
| Class              | Soluble                            | Soluble                                  | Soluble                         |
| Log S (Ali)        | -4.31                              | -2.34                                    | -2.76                           |
| Solubility         | 1.51e-02 mg/ml<br>;4.89e-05 mol/l  | 1.13e+00<br>mg/ml ;<br>4.60e-03<br>mol/l | 4.63e-01 mg/ml ; 1.75e-03 mol/l |
| Class              | Moderately<br>soluble              | Soluble                                  | Soluble                         |
| Log S (SILICOS-IT) | -2.58                              | -1.26                                    | -1.57                           |
| Solubility         | 8.04e-01 mg/ml<br>; 2.61e-03 mol/l | 1.34e+01<br>mg/ml ;<br>5.46e-02<br>mol/l | 7.16e+00 mg/ml ; 2.71e-02 mol/l |
| Class              | Soluble                            | Soluble                                  | Soluble                         |
|                    | Pharmacokinetics                   |                                          |                                 |
| GI absorption      | High                               | High                                     | High                            |
| BBB permeant       | No                                 | No                                       | No                              |
| P-gp substrate     | Yes                                | No                                       | No                              |
| CYP1A2 inhibitor   | Yes                                | No                                       | No                              |
| CYP2C19 inhibitor  | No                                 | No                                       | No                              |
| CYP2C9 inhibitor   | No                                 | No                                       | No                              |

|                          |                                       |                                       |                                |
|--------------------------|---------------------------------------|---------------------------------------|--------------------------------|
| CYP2D6 inhibitor         | No                                    | No                                    | No                             |
| CYP3A4 inhibitor         | No                                    | No                                    | No                             |
| Log Kp (skin permeation) | -6.87cm/s                             | -7.13 cm/s                            | -7.06 cm/s                     |
|                          | Drug-likeness                         |                                       |                                |
| Lipinski                 | Yes; 0 violation                      | Yes; 0 violation                      | Yes; 0 violation               |
| Ghose                    | Yes                                   | Yes                                   | Yes                            |
| Veber                    | Yes                                   | Yes                                   | Yes                            |
| Egan                     | No; 1 violation:<br>TPSA>131.6        | Yes                                   | Yes                            |
| Muegge                   | Yes                                   | Yes                                   | Yes                            |
| Bioavailability Score    | 0.55                                  | 0.56                                  | 0.56                           |
|                          | Medicinal Chemistry                   |                                       |                                |
| PAINS                    | 0 alert                               | 0 alert                               | 0 alert                        |
| Brenk                    | 1 alert:<br>quaternary_<br>nitrogen_1 | 1 alert:<br>quaternary_nitrog<br>en_1 | 1 alert: quaternary_nitrogen_1 |
| Lead-likeness            | Yes                                   | No; 1 violation:<br>MW<250            | Yes                            |
| Synthetic accessibility  | 2.82                                  | 2.19                                  | 2.27                           |
